# Supplementary material for: Construction of a rural tourism information service management system for multi-source heterogeneous data processing
Source: PeerJ journal article supplement (doi:10.7717/peerj-cs.1334), 2023-06-09
Supplement: Dataset.zip [file Dataset.zip]

## Sheet: Sheet1
sentence	token	pos	dep	label
sentence 1	the	DET	det	O
	asramam	NOUN	compound	activity_center
	adventure	NOUN	compound	activity_center
	park	NOUN	nsubjpass	activity_center
	is	AUX	auxpass	O
	situated	VERB	ROOT	loc_area
	at	ADP	prep	O
	kollam	NOUN	pobj	place
sentence 2	the	DET	det	O
	asramam	NOUN	compound	activity_center
	adventure	NOUN	compound	activity_center
	park	NOUN	nsubj	activity_center
	opens	VERB	ROOT	entry_exit
	at	ADP	prep	O
	10	NUM	nummod	time
	am	NOUN	pobj	time
sentence 3	the	DET	det	O
sentence 3	asramam	NOUN	compound	activity_center
sentence 3	adventure	NOUN	compound	activity_center
sentence 3	park	NOUN	nsubjpass	activity_center
sentence 3	is	AUX	auxpass	O
sentence 3	closes	NOUN	ROOT	entry_exit
sentence 3	at	ADP	prep	O
sentence 3	6	NUM	nummod	time
sentence 3	pm	NOUN	pobj	time
sentence 4	the	DET	det	O
sentence 4	asramam	NOUN	compound	activity_center
sentence 4	adventure	NOUN	compound	activity_center
sentence 4	park	NOUN	nsubj	activity_center
sentence 4	has	VERB	ROOT	location_feature
sentence 4	a	DET	det	O
sentence 4	childrens	NOUN	compound	activity_center
sentence 4	park	NOUN	dobj	activity_center
sentence 5	the	DET	det	O
sentence 5	asramam	NOUN	compound	activity_center
sentence 5	adventure	NOUN	compound	activity_center
sentence 5	park	NOUN	nsubj	activity_center
sentence 5	has	VERB	ROOT	location_feature
sentence 5	houses	NOUN	compound	O
sentence 5	boat	NOUN	compound	activity_center
sentence 5	club	NOUN	dobj	activity_center
sentence 6	the	DET	det	O
sentence 6	asramam	NOUN	compound	activity_center
sentence 6	adventure	NOUN	compound	activity_center
sentence 6	park	NOUN	nsubj	activity_center
sentence 6	has	AUX	aux	O
sentence 6	spread	VERB	ROOT	location_feature
sentence 6	across	ADP	prep	location_feature
sentence 6	48	NUM	nummod	feature
sentence 6	acres	NOUN	pobj	feature
sentence 7	the	DET	det	O
sentence 7	asramam	NOUN	compound	activity_center
sentence 7	adventure	NOUN	compound	activity_center
sentence 7	park	NOUN	nsubj	activity_center
sentence 7	is	AUX	ROOT	O
sentence 7	sides	NOUN	attr	location_feature
sentence 7	through	ADP	prep	location_feature
sentence 7	the	DET	det	O
sentence 7	ashtamudi	ADJ	amod	river
sentence 7	kayal	NOUN	pobj	river
sentence 8	thirumullavaram	NOUN	compound	beach
sentence 8	Beach	NOUN	nsubj	beach
sentence 8	opens	VERB	ROOT	entry_exit
sentence 8	at	ADP	prep	O
sentence 8	4	NUM	nummod	time
sentence 8	am	NOUN	pobj	time
sentence 9	thirumullavaram	NOUN	compound	beach
sentence 9	beach	PROPN	nsubjpass	beach
sentence 9	is	AUX	auxpass	O
sentence 9	closes	NOUN	ROOT	entry_exit
sentence 9	at	ADP	prep	O
sentence 9	8	NUM	nummod	time
sentence 9	pm	NOUN	pobj	time
sentence 10	karkidaka	NOUN	compound	activity_center
sentence 10	vavubali	NOUN	nsubjpass	activity_center
sentence 10	is	AUX	auxpass	O
sentence 10	held	VERB	ROOT	location_feature
sentence 10	at	ADP	prep	O
sentence 10	thirumullavaram	NOUN	compound	beach
sentence 10	beach	NOUN	pobj	beach
sentence 11	thirumullavaram	NOUN	compound	beach
sentence 11	beach	NOUN	nsubjpass	beach
sentence 11	is	AUX	auxpass	O
sentence 11	situated	VERB	ROOT	loc_area
sentence 11	at	ADP	prep	O
sentence 11	kollam	NOUN	pobj	place
sentence 12	the	DET	det	O
sentence 12	thevally	ADV	amod	place
sentence 12	palace	NOUN	nsubjpass	place
sentence 12	is	AUX	auxpass	O
sentence 12	situated	VERB	ROOT	loc_area
sentence 12	at	ADP	prep	O
sentence 12	kollam	NOUN	pobj	place
sentence 13	the	DET	det	O
sentence 13	thevally	ADV	amod	place
sentence 13	palace	NOUN	nsubj	place
sentence 13	is	AUX	ROOT	O
sentence 13	near	ADJ	acomp	loc_near
sentence 13	to	ADP	prep	O
sentence 13	the	DET	det	O
sentence 13	ashtamude	NOUN	compound	river
sentence 13	lake	NOUN	pobj	river
sentence 14	the	DET	det	O
sentence 14	thevally	ADV	amod	place
sentence 14	palace	NOUN	nsubj	place
sentence 14	is	AUX	ROOT	O
sentence 14	home	NOUN	attr	location_feature
sentence 14	to	ADP	prep	O
sentence 14	the	DET	det	O
sentence 14	travancore	NOUN	compound	person
sentence 14	maharaja	NOUN	pobj	person
sentence 15	the	DET	det	O
sentence 15	thevally	ADV	amod	place
sentence 15	palace	NOUN	nsubjpass	place
sentence 15	is	AUX	auxpass	O
sentence 15	constructed	VERB	ROOT	location_feature
sentence 15	by	ADP	agent	O
sentence 15	gauri	NOUN	compound	person
sentence 15	parvathi	NOUN	compound	person
sentence 15	bai	NOUN	pobj	person
sentence 16	the	DET	det	O
sentence 16	thevally	ADV	amod	place
sentence 16	palace	NOUN	nsubjpass	place
sentence 16	is	AUX	auxpass	O
sentence 16	constructed	VERB	ROOT	location_feature
sentence 16	in	ADP	prep	O
sentence 16	1819	NUM	pobj	year
sentence 17	the	DET	det	O
sentence 17	thevally	ADV	amod	place
sentence 17	palace	NOUN	nsubj	place
sentence 17	opens	VERB	ROOT	entry_exit
sentence 17	at	ADP	prep	O
sentence 17	9	NUM	nummod	time
sentence 17	am	NOUN	pobj	time
sentence 18	the	DET	det	O
sentence 18	thevally	ADV	amod	place
sentence 18	palace	NOUN	nsubjpass	place
sentence 18	is	AUX	auxpass	O
sentence 18	closes	NOUN	ROOT	entry_exit
sentence 18	at	ADP	prep	O
sentence 18	5	NUM	nummod	time
sentence 18	pm	NOUN	pobj	time
sentence 19	the	DET	det	O
sentence 19	kollam	NOUN	compound	beach
sentence 19	beach	NOUN	nsubj	beach
sentence 19	is	AUX	auxpass	O
sentence 19	opens	NOUN	ROOT	entry_exit
sentence 19	for	ADP	prep	O
sentence 19	24	NUM	nummod	time
sentence 19	hours	NOUN	pobj	time
sentence 20	the	DET	det	O
sentence 20	kollam	NOUN	compound	beach
sentence 20	beach	NOUN	nsubj	beach
sentence 20	has	VERB	ROOT	location_feature
sentence 20	thangassery	NOUN	dobj	activity_center
sentence 20	lighthous	ADJ	amod	activity_center
sentence 21	the	DET	det	O
sentence 21	kollam	NOUN	compound	beach
sentence 21	beach	NOUN	nsubjpass	beach
sentence 21	is	AUX	auxpass	O
sentence 21	situated	VERB	ROOT	loc_area
sentence 21	at	ADP	prep	O
sentence 21	kollam	NOUN	pobj	place
sentence 22	the	DET	det	O
sentence 22	pazhassi	PROPN	compound	activity_center
sentence 22	raja	NOUN	compound	activity_center
sentence 22	museum	NOUN	nsubjpass	activity_center
sentence 22	is	AUX	auxpass	O
sentence 22	situated	VERB	ROOT	loc_area
sentence 22	at	ADP	prep	O
sentence 22	calicut	NOUN	pobj	place
sentence 23	the	DET	det	O
sentence 23	thikkoti	PROPN	nmod	activity_center
sentence 23	light	ADJ	compound	activity_center
sentence 23	house	NOUN	nsubjpass	activity_center
sentence 23	is	AUX	auxpass	O
sentence 23	situated	VERB	ROOT	loc_area
sentence 23	at	ADP	prep	O
sentence 23	calicut	NOUN	pobj	place
sentence 24	the	DET	det	O
sentence 24	kozhikode	PROPN	compound	beach
sentence 24	beach	NOUN	nsubjpass	beach
sentence 24	is	AUX	auxpass	O
sentence 24	situated	VERB	ROOT	loc_area
sentence 24	at	ADP	prep	O
sentence 24	calicut	NOUN	pobj	place
sentence 25	the	DET	det	O
sentence 25	mananchira	PROPN	compound	activity_center
sentence 25	square	PROPN	nsubjpass	activity_center
sentence 25	is	AUX	auxpass	O
sentence 25	situated	VERB	ROOT	loc_area
sentence 25	at	ADP	prep	O
sentence 25	calicut	NOUN	pobj	place
sentence 26	the	DET	det	O
sentence 26	beypore	NOUN	nsubjpass	place
sentence 26	is	AUX	auxpass	O
sentence 26	situated	VERB	ROOT	loc_area
sentence 26	at	ADP	prep	O
sentence 26	calicut	NOUN	pobj	place
sentence 27	the	DET	det	O
sentence 27	kadalundi	PROPN	compound	sanctuary
sentence 27	bird	NOUN	compound	sanctuary
sentence 27	sanctuary	NOUN	nsubjpass	sanctuary
sentence 27	is	AUX	auxpass	O
sentence 27	situated	VERB	ROOT	loc_area
sentence 27	at	ADP	prep	O
sentence 27	calicut	NOUN	pobj	place
sentence 28	the	DET	det	O
sentence 28	thali	PROPN	amod	temple
sentence 28	temple	PROPN	nsubjpass	temple
sentence 28	is	AUX	auxpass	O
sentence 28	situated	VERB	ROOT	loc_area
sentence 28	at	ADP	prep	O
sentence 28	calicut	NOUN	pobj	place
sentence 29	the	DET	det	O
sentence 29	calicut	NOUN	compound	activity_center
sentence 29	planetarium	NOUN	nsubjpass	activity_center
sentence 29	is	AUX	auxpass	O
sentence 29	situated	VERB	ROOT	loc_area
sentence 29	at	ADP	prep	place
sentence 29	calicut	NOUN	pobj	place
sentence 30	the	DET	det	O
sentence 30	mishkal	PROPN	compound	mosque
sentence 30	mosque	NOUN	nsubjpass	mosque
sentence 30	is	AUX	auxpass	O
sentence 30	situated	VERB	ROOT	loc_area
sentence 30	at	ADP	prep	O
sentence 30	calicut	NOUN	pobj	place
sentence 31	the	DET	det	O
sentence 31	mother	NOUN	nsubjpass	church
sentence 31	of	ADP	prep	church
sentence 31	god	PROPN	compound	church
sentence 31	cathedral	PROPN	pobj	church
sentence 31	is	AUX	auxpass	O
sentence 31	situated	VERB	ROOT	loc_area
sentence 31	at	ADP	prep	O
sentence 31	calicut	NOUN	pobj	place
sentence 32	the	DET	det	O
sentence 32	peruvannamuzhi	ADJ	compound	dam
sentence 32	dam	NOUN	nsubjpass	dam
sentence 32	is	AUX	auxpass	O
sentence 32	situated	VERB	ROOT	loc_area
sentence 32	at	ADP	prep	O
sentence 32	calicut	NOUN	pobj	place
sentence 33	the	DET	det	O
sentence 33	krishna	NOUN	compound	activity_center
sentence 33	menon	PROPN	compound	activity_center
sentence 33	museum	NOUN	nsubjpass	activity_center
sentence 33	is	AUX	auxpass	O
sentence 33	situated	VERB	ROOT	loc_area
sentence 33	at	ADP	prep	O
sentence 33	calicut	NOUN	pobj	place
sentence 34	the	DET	det	O
sentence 34	lion	NOUN	poss	activity_center
sentence 34	’s	PART	case	activity_center
sentence 34	park	NOUN	nsubjpass	activity_center
sentence 34	is	AUX	auxpass	O
sentence 34	situated	VERB	ROOT	loc_area
sentence 34	at	ADP	prep	O
sentence 34	calicut	NOUN	pobj	place
sentence 35	the	DET	det	O
sentence 35	kozhippara	PROPN	nsubj	waterfalls
sentence 35	falls	VERB	nsubjpass	waterfalls
sentence 35	is	AUX	auxpass	O
sentence 35	situated	VERB	ROOT	loc_area
sentence 35	at	ADP	prep	O
sentence 35	calicut	NOUN	pobj	place
sentence 36	the	DET	det	O
sentence 36	thusharagiri	NOUN	nsubj	waterfalls
sentence 36	falls	VERB	nsubjpass	waterfalls
sentence 36	is	AUX	auxpass	O
sentence 36	situated	VERB	ROOT	loc_area
sentence 36	at	ADP	prep	O
sentence 36	calicut	NOUN	pobj	place
sentence 37	the	DET	det	O
sentence 37	kakkayam	PROPN	compound	dam
sentence 37	dam	NOUN	nsubjpass	dam
sentence 37	is	AUX	auxpass	O
sentence 37	situated	VERB	ROOT	loc_area
sentence 37	at	ADP	prep	O
sentence 37	calicut	NOUN	pobj	place
sentence 38	the	DET	det	O
sentence 38	sweet	ADJ	amod	activity_center
sentence 38	street	NOUN	nsubjpass	activity_center
sentence 38	is	AUX	auxpass	O
sentence 38	situated	VERB	ROOT	loc_area
sentence 38	at	ADP	prep	O
sentence 38	calicut	NOUN	pobj	place
sentence 39	the	DET	det	O
sentence 39	elathur	PROPN	nsubjpass	place
sentence 39	is	AUX	auxpass	O
sentence 39	situated	VERB	ROOT	loc_area
sentence 39	at	ADP	prep	O
sentence 39	calicut	NOUN	pobj	place
sentence 40	the	DET	det	O
sentence 40	vellari	PROPN	compound	hill_area
sentence 40	mala	PROPN	nsubjpass	hill_area
sentence 40	is	AUX	auxpass	O
sentence 40	situated	VERB	ROOT	loc_area
sentence 40	at	ADP	prep	O
sentence 40	calicut	NOUN	pobj	place
sentence 41	the	DET	det	O
sentence 41	sargaalaya	NOUN	compound	activity_center
sentence 41	kerala	PROPN	compound	activity_center
sentence 41	arts	NOUN	nsubjpass	activity_center
sentence 41	is	AUX	auxpass	O
sentence 41	situated	VERB	ROOT	loc_area
sentence 41	at	ADP	prep	O
sentence 41	calicut	NOUN	pobj	place
sentence 42	the	DET	det	O
sentence 42	kappad	PROPN	compound	beach
sentence 42	beach	NOUN	nsubjpass	beach
sentence 42	is	AUX	auxpass	O
sentence 42	situated	VERB	ROOT	loc_area
sentence 42	at	ADP	prep	O
sentence 42	calicut	NOUN	pobj	place
sentence 43	the	DET	det	O
sentence 43	canoli	PROPN	compound	activity_center
sentence 43	canal	NOUN	nsubjpass	activity_center
sentence 43	is	AUX	auxpass	O
sentence 43	situated	VERB	ROOT	loc_area
sentence 43	at	ADP	prep	O
sentence 43	calicut	NOUN	pobj	place
sentence 44	varkala	PROPN	compound	beach
sentence 44	beach	PROPN	nsubj	beach
sentence 44	has	VERB	ROOT	location_feature
sentence 44	beach	NOUN	dobj	beach
sentence 45	kovalam	PROPN	compound	beach
sentence 45	beach	PROPN	nsubj	beach
sentence 45	has	AUX	aux	location_feature
sentence 45	beach	VERB	ROOT	beach
sentence 46	bekal	NOUN	compound	beach
sentence 46	beach	NOUN	nsubj	beach
sentence 46	has	AUX	aux	location_feature
sentence 46	beach	VERB	ROOT	beach
sentence 47	chavakkad	NOUN	compound	beach
sentence 47	beach	NOUN	nsubj	beach
sentence 47	has	AUX	aux	location_feature
sentence 47	beach	VERB	ROOT	beach
sentence 48	nattika	PROPN	compound	beach
sentence 48	beach	PROPN	nsubj	beach
sentence 48	has	AUX	aux	location_feature
sentence 48	beach	VERB	ROOT	beach
sentence 49	neendakara	PROPN	compound	beach
sentence 49	beach	PROPN	nsubj	beach
sentence 49	has	AUX	aux	location_feature
sentence 49	beach	VERB	ROOT	beach
sentence 50	kappad	PROPN	compound	beach
sentence 50	beach	PROPN	nsubj	beach
sentence 50	has	AUX	aux	location_feature
sentence 50	beach	VERB	ROOT	beach
sentence 51	marari	PROPN	compound	beach
sentence 51	beach	NOUN	nsubj	beach
sentence 51	has	AUX	aux	location_feature
sentence 51	beach	VERB	ROOT	beach
sentence 52	payyambalam	PROPN	compound	beach
sentence 52	beach	PROPN	nsubj	beach
sentence 52	has	AUX	aux	location_feature
sentence 52	beach	VERB	ROOT	beach
sentence 53	the	DET	det	O
sentence 53	meenvallam	PROPN	compound	waterfalls
sentence 53	waterfalls	NOUN	nsubjpass	waterfalls
sentence 53	is	AUX	auxpass	O
sentence 53	situated	VERB	ROOT	loc_area
sentence 53	at	ADP	prep	O
sentence 53	palakkad	NOUN	pobj	place
sentence 54	the	DET	det	O
sentence 54	meenvallam	PROPN	compound	waterfalls
sentence 54	waterfalls	NOUN	nsubj	waterfalls
sentence 54	opens	VERB	ROOT	entry_exit
sentence 54	at	ADP	prep	O
sentence 54	9	NUM	pobj	time
sentence 54	am	NOUN	npadvmod	time
sentence 55	the	DET	det	O
sentence 55	meenvallam	PROPN	compound	waterfalls
sentence 55	waterfalls	NOUN	nsubj	waterfalls
sentence 55	is	AUX	ROOT	O
sentence 55	closes	NOUN	attr	entry_exit
sentence 55	at	ADP	prep	O
sentence 55	5	NUM	nummod	time
sentence 55	pm	NOUN	pobj	time
sentence 56	the	DET	det	O
sentence 56	meenvallam	PROPN	compound	waterfalls
sentence 56	waterfalls	NOUN	nsubjpass	waterfalls
sentence 56	is	AUX	auxpass	O
sentence 56	located	VERB	ROOT	loc_area
sentence 56	at	ADP	prep	O
sentence 56	the	DET	det	O
sentence 56	karimba	NOUN	compound	place
sentence 56	town	NOUN	pobj	place
sentence 57	the	DET	det	O
sentence 57	meenvallam	PROPN	compound	waterfalls
sentence 57	waterfalls	NOUN	nsubj	waterfalls
sentence 57	is	AUX	ROOT	O
sentence 57	under	ADP	prep	location_feature
sentence 57	the	DET	det	O
sentence 57	western	ADJ	amod	ghats
sentence 57	ghats	NOUN	pobj	ghats
sentence 58	the	DET	det	O
sentence 58	meenvallam	PROPN	compound	waterfalls
sentence 58	waterfalls	NOUN	nsubj	waterfalls
sentence 58	has	VERB	ROOT	location_feature
sentence 58	381	NUM	nummod	feature
sentence 58	meter	NOUN	compound	feature
sentence 58	height	NOUN	dobj	feature
sentence 59	the	DET	det	O
sentence 59	meenvallam	PROPN	compound	waterfalls
sentence 59	waterfalls	NOUN	nsubjpass	waterfalls
sentence 59	is	AUX	auxpass	O
sentence 59	passes	NOUN	ROOT	location_feature
sentence 59	through	ADP	prep	location_feature
sentence 59	kalladikodan	PROPN	compound	hills
sentence 59	hills	PROPN	pobj	hills
sentence 60	kozhikode	PROPN	compound	beach
sentence 60	beach	PROPN	nsubj	beach
sentence 60	has	AUX	aux	location_feature
sentence 60	beach	VERB	ROOT	beach
sentence 61	meenkunnu	PROPN	compound	beach
sentence 61	beach	NOUN	nsubj	beach
sentence 61	has	AUX	aux	location_feature
sentence 61	beach	VERB	ROOT	beach
sentence 62	kappil	PROPN	compound	beach
sentence 62	beach	PROPN	nsubj	beach
sentence 62	has	AUX	aux	location_feature
sentence 62	beach	VERB	ROOT	beach
sentence 63	cherai	PROPN	compound	beach
sentence 63	beach	NOUN	nsubj	beach
sentence 63	has	AUX	aux	location_feature
sentence 63	beach	VERB	ROOT	beach
sentence 64	shankumugham	PROPN	compound	beach
sentence 64	beach	PROPN	nsubj	beach
sentence 64	has	AUX	aux	location_feature
sentence 64	beach	VERB	ROOT	beach
sentence 65	chowara	PROPN	compound	beach
sentence 65	beach	PROPN	nsubj	beach
sentence 65	has	AUX	aux	location_feature
sentence 65	beach	VERB	ROOT	beach
sentence 66	the	DET	det	O
sentence 66	kanjirapuzha	NOUN	compound	dam
sentence 66	dam	NOUN	nsubj	dam
sentence 66	opens	VERB	ROOT	entry_exit
sentence 66	at	ADP	prep	O
sentence 66	10	NUM	pobj	time
sentence 66	am	NOUN	npadvmod	time
sentence 67	the	DET	det	O
sentence 67	kanjirapuzha	PROPN	compound	dam
sentence 67	dam	NOUN	nsubj	dam
sentence 67	is	AUX	ROOT	O
sentence 67	closes	NOUN	attr	entry_exit
sentence 67	at	ADP	prep	O
sentence 67	7	NUM	nummod	time
sentence 67	pm	NOUN	pobj	time
sentence 68	the	DET	det	O
sentence 68	kanjirapuzha	NOUN	compound	dam
sentence 68	dam	NOUN	nsubjpass	dam
sentence 68	is	AUX	auxpass	O
sentence 68	located	VERB	ROOT	loc_area
sentence 68	at	ADP	prep	O
sentence 68	the	DET	det	O
sentence 68	kanjirapuzha	NOUN	compound	place
sentence 68	mannarkkad	NOUN	pobj	place
sentence 69	the	DET	det	O
sentence 69	kanjirapuzha	PROPN	compound	dam
sentence 69	dam	NOUN	nsubj	dam
sentence 69	has	VERB	ROOT	location_feature
sentence 69	308	NUM	nummod	feature
sentence 69	meter	NOUN	compound	feature
sentence 69	height	NOUN	dobj	feature
sentence 70	muzhappilangad	PROPN	compound	beach
sentence 70	beach	PROPN	nsubj	beach
sentence 70	has	AUX	aux	location_feature
sentence 70	beach	VERB	ROOT	beach
sentence 71	beypore	ADJ	amod	beach
sentence 71	beach	NOUN	nsubj	beach
sentence 71	has	AUX	aux	location_feature
sentence 71	beach	VERB	ROOT	beach
sentence 72	kanwatheertha	PROPN	compound	beach
sentence 72	beach	NOUN	nsubj	beach
sentence 72	has	AUX	aux	location_feature
sentence 72	beach	VERB	ROOT	beach
sentence 73	kuzhupilly	ADV	advmod	beach
sentence 73	beach	NOUN	nsubj	beach
sentence 73	has	AUX	aux	location_feature
sentence 73	beach	VERB	ROOT	beach
sentence 74	lions	NOUN	compound	activity_center
sentence 74	park	NOUN	nsubj	activity_center
sentence 74	opens	VERB	ROOT	entry_exit
sentence 74	at	ADP	prep	O
sentence 74	10	NUM	nummod	time
sentence 74	am	NOUN	pobj	time
sentence 75	lions	NOUN	compound	activity_center
sentence 75	park	NOUN	nsubj	activity_center
sentence 75	is	AUX	ROOT	O
sentence 75	closes	NOUN	attr	entry_exit
sentence 75	at	ADP	prep	O
sentence 75	7	NUM	nummod	time
sentence 75	pm	NOUN	pobj	time
sentence 76	lions	NOUN	compound	activity_center
sentence 76	park	NOUN	nsubj	activity_center
sentence 76	is	AUX	ROOT	O
sentence 76	for	ADP	prep	location_feature
sentence 76	the	DET	det	O
sentence 76	amusement	NOUN	compound	activity_center
sentence 76	park	NOUN	pobj	activity_center
sentence 77	lions	NOUN	compound	activity_center
	park	NOUN	nsubj	activity_center
	is	AUX	ROOT	O
	near	ADJ	acomp	loc_near
	to	ADP	prep	O
	the	DET	det	O
	kozhikode	PROPN	compound	beach
	beach	NOUN	pobj	beach
sentence 78	lions	NOUN	compound	activity_center
	park	NOUN	nsubjpass	activity_center
	is	AUX	auxpass	O
	known	VERB	ROOT	location_feature
	as	ADP	prep	O
	calicut	ADJ	amod	activity_center
	beach	NOUN	compound	activity_center
	garden	NOUN	pobj	activity_center
sentence 79	elathur	PROPN	compound	place
sentence 79	town	PROPN	nsubjpass	place
sentence 79	is	AUX	auxpass	O
sentence 79	situated	VERB	ROOT	loc_area
sentence 79	at	ADP	prep	O
sentence 79	calicut	NOUN	pobj	place
sentence 80	seafoods	NOUN	nsubj	feature
sentence 80	are	AUX	ROOT	O
sentence 80	available	ADJ	acomp	location_feature
sentence 80	at	ADP	prep	O
sentence 80	elathur	PROPN	compound	place
sentence 80	town	PROPN	pobj	place
sentence 81	toddy	NOUN	nsubj	feature
sentence 81	is	AUX	ROOT	O
sentence 81	available	ADJ	acomp	location_feature
sentence 81	at	ADP	prep	O
sentence 81	elathur	PROPN	compound	place
sentence 81	town	PROPN	pobj	place
sentence 82	elathur	PROPN	compound	place
sentence 82	town	PROPN	nsubjpass	place
sentence 82	is	AUX	auxpass	O
sentence 82	surrounded	VERB	ROOT	location_feature
sentence 82	by	ADP	agent	location_feature
sentence 82	lakes	NOUN	pobj	river
sentence 83	vellarimala	PROPN	nsubjpass	place
sentence 83	is	AUX	auxpass	O
sentence 83	situated	VERB	ROOT	loc_area
sentence 83	at	ADP	prep	O
sentence 83	calicut	NOUN	pobj	place
sentence 84	vellarimala	PROPN	nsubj	place
sentence 84	is	AUX	ROOT	O
sentence 84	part	NOUN	attr	location_feature
sentence 84	of	ADP	prep	O
sentence 84	the	DET	det	O
sentence 84	western	ADJ	amod	ghats
sentence 84	ghats	NOUN	pobj	ghats
sentence 85	small	ADJ	amod	O
sentence 85	waterfalls	NOUN	nsubjpass	waterfalls
sentence 85	can	AUX	aux	O
sentence 85	be	AUX	auxpass	O
sentence 85	seen	VERB	ROOT	location_feature
sentence 85	at	ADP	prep	O
sentence 85	vellarimala	NOUN	pobj	place
sentence 85	cliff	NOUN	compound	activity_center
sentence 86	views	NOUN	nsubjpass	activity_center
sentence 86	are	AUX	auxpass	O
sentence 86	offered	VERB	ROOT	location_feature
sentence 86	at	ADP	prep	O
sentence 86	vellarimala	NOUN	pobj	place
sentence 87	vellarimala	PROPN	nsubj	place
sentence 87	has	VERB	ROOT	location_feature
sentence 87	2339	NUM	nummod	feature
sentence 87	meter	NOUN	compound	feature
sentence 87	height	NOUN	dobj	feature
sentence 88	vellarimala	PROPN	nsubjpass	place
sentence 88	is	AUX	auxpass	O
sentence 88	located	VERB	ROOT	loc_area
sentence 88	at	ADP	prep	O
sentence 88	muthappanpuzha	NOUN	pobj	place
sentence 89	vellarimala	NOUN	nsubj	place
sentence 89	opens	VERB	ROOT	entry_exit
sentence 89	at	ADP	prep	O
sentence 89	5.3	NUM	nummod	time
sentence 89	am	NOUN	pobj	time
sentence 90	vellarimala	PROPN	nsubj	place
sentence 90	is	AUX	ROOT	O
sentence 90	closes	NOUN	attr	entry_exit
sentence 90	at	ADP	prep	O
sentence 90	6	NUM	nummod	time
sentence 90	pm	NOUN	pobj	time
sentence 91	peruvannamuzhi	PROPN	compound	dam
sentence 91	dam	NOUN	nsubjpass	dam
sentence 91	is	AUX	auxpass	O
sentence 91	known	VERB	ROOT	location_feature
sentence 91	as	ADP	prep	O
sentence 91	kuttiyadi	NOUN	compound	dam
sentence 91	dam	NOUN	pobj	dam
sentence 92	peruvannamuzhi	PROPN	compound	dam
sentence 92	dam	NOUN	nsubjpass	dam
sentence 92	is	AUX	auxpass	O
sentence 92	built	VERB	ROOT	location_feature
sentence 92	on	ADP	prep	O
sentence 92	the	DET	det	O
sentence 92	kuttiyadi	NOUN	compound	river
sentence 92	river	NOUN	pobj	river
sentence 93	peruvannamuzhi	PROPN	compound	dam
sentence 93	dam	NOUN	nsubjpass	dam
sentence 93	is	AUX	auxpass	O
sentence 93	located	VERB	ROOT	loc_area
sentence 93	at	ADP	prep	O
sentence 93	chakkittipara	PROPN	pobj	place
sentence 94	peruvannamuzhi	PROPN	compound	dam
sentence 94	dam	NOUN	nsubjpass	dam
sentence 94	is	AUX	auxpass	O
sentence 94	constructed	VERB	ROOT	location_feature
sentence 94	in	ADP	prep	O
sentence 94	1973	NUM	pobj	year
sentence 95	peruvannamuzhi	PROPN	compound	dam
sentence 95	dam	NOUN	nsubj	dam
sentence 95	opens	VERB	ROOT	entry_exit
sentence 95	at	ADP	prep	O
sentence 95	10	NUM	nummod	time
sentence 95	am	NOUN	pobj	time
sentence 96	peruvannamuzhi	PROPN	compound	dam
sentence 96	dam	NOUN	nsubj	dam
sentence 96	is	AUX	ROOT	O
sentence 96	closes	NOUN	attr	entry_exit
sentence 96	at	ADP	prep	O
sentence 96	5	NUM	nummod	time
sentence 96	pm	NOUN	pobj	time
sentence 97	boating	VERB	amod	feature
sentence 97	facilities	NOUN	nsubjpass	feature
sentence 97	are	AUX	auxpass	O
sentence 97	offered	VERB	ROOT	location_feature
sentence 97	at	ADP	prep	O
sentence 97	peruvannamuzhi	PROPN	compound	dam
sentence 97	dam	NOUN]	pobj	dam
sentence 98	shendurney	PROPN	compound	sanctuary
sentence 98	wildlife	NOUN	compound	sanctuary
sentence 98	sanctuary	NOUN	nsubjpass	sanctuary
sentence 98	is	AUX	auxpass	O
sentence 98	located	VERB	ROOT	loc_area
sentence 98	at	ADP	prep	O
sentence 98	the	DET	det	O
sentence 98	thenmala	NOUN	pobj	place
sentence 99	shendurney	PROPN	compound	sanctuary
sentence 99	wildlife	NOUN	compound	sanctuary
sentence 99	sanctuary	NOUN	nsubj	sanctuary
sentence 99	opens	VERB	ROOT	entry_exit
sentence 99	at	ADP	prep	O
sentence 99	7	NUM	nummod	time
sentence 99	am	NOUN	pobj	time
sentence 100	shendurney	PROPN	compound	sanctuary
sentence 100	wildlife	NOUN	compound	sanctuary
sentence 100	sanctuary	NOUN	nsubj	sanctuary
sentence 100	is	AUX	ROOT	O
sentence 100	closes	NOUN	attr	entry_exit
sentence 100	at	ADP	prep	O
sentence 100	6	NUM	nummod	time
sentence 100	pm	NOUN	pobj	time
sentence 101	shendurney	PROPN	compound	sanctuary
sentence 101	wildlife	NOUN	compound	sanctuary
sentence 101	sanctuary	NOUN	nsubjpass	sanctuary
sentence 101	is	AUX	auxpass	O
sentence 101	situated	VERB	ROOT	loc_area
sentence 101	at	ADP	prep	O
sentence 101	kollam	PROPN	pobj	place
sentence 102	shendurney	PROPN	compound	sanctuary
sentence 102	wildlife	NOUN	compound	sanctuary
sentence 102	sanctuary	NOUN	nsubj	sanctuary
sentence 102	is	AUX	ROOT	O
sentence 102	part	NOUN	attr	location_feature
sentence 102	of	ADP	prep	O
sentence 102	the	DET	det	O
sentence 102	agasthyamala	PROPN	compound	sanctuary
sentence 102	biosphere	PROPN	compound	sanctuary
sentence 102	reserve	PROPN	pobj	sanctuary
sentence 103	the	DET	det	O
sentence 103	gluta	NOUN	nsubjpass	feature
sentence 103	travancorica	PROPN	nsubjpass	feature
sentence 103	can	AUX	aux	O
sentence 103	be	AUX	auxpass	O
sentence 103	seen	VERB	ROOT	location_feature
sentence 103	in	ADP	prep	O
sentence 103	the	DET	det	O
sentence 103	shendurney	NOUN	compound	sanctuary
sentence 103	wildlife	NOUN	compound	sanctuary
sentence 103	sanctuary	NOUN	pobj	sanctuary
sentence 104	jeep	PROPN	amod	feature
sentence 104	safari	PROPN	nsubjpass	feature
sentence 104	is	AUX	auxpass	O
sentence 104	offered	VERB	ROOT	location_feature
sentence 104	at	ADP	prep	O
sentence 104	the	DET	det	O
sentence 104	shendurney	NOUN	compound	sanctuary
sentence 104	wildlife	NOUN	compound	sanctuary
sentence 104	sanctuary	NOUN	pobj	sanctuary
sentence 105	boat	NOUN	compound	feature
sentence 105	ride	NOUN	nsubjpass	feature
sentence 105	is	AUX	auxpass	O
sentence 105	offered	VERB	ROOT	location_feature
sentence 105	at	ADP	prep	O
sentence 105	the	DET	det	O
sentence 105	shendurney	NOUN	compound	sanctuary
sentence 105	wildlife	NOUN	compound	sanctuary
sentence 105	sanctuary	NOUN	pobj	sanctuary
sentence 106	trekking	NOUN	nsubjpass	feature
sentence 106	is	AUX	auxpass	O
sentence 106	offered	VERB	ROOT	location_feature
sentence 106	at	ADP	prep	O
sentence 106	the	DET	det	O
sentence 106	shendurney	NOUN	compound	sanctuary
sentence 106	wildlife	NOUN	compound	sanctuary
sentence 106	sanctuary	NOUN	pobj	sanctuary
sentence 107	shendurney	PROPN	compound	sanctuary
sentence 107	wildlife	NOUN	compound	sanctuary
sentence 107	sanctuary	NOUN	nsubj	sanctuary
sentence 107	is	AUX	ROOT	O
sentence 107	on	ADP	prep	location_feature
sentence 107	the	DET	det	O
sentence 107	western	ADJ	amod	ghats
sentence 107	ghats	NOUN	pobj	ghats
sentence 108	the	DET	det	O
sentence 108	eared	ADJ	amod	feature
sentence 108	nightjar	NOUN	nsubj	feature
sentence 108	has	AUX	aux	O
sentence 108	spotted	VERB	ROOT	location_feature
sentence 108	shendurney	NOUN	compound	sanctuary
sentence 108	wildlife	NOUN	compound	sanctuary
sentence 108	sanctuary	NOUN	dobj	sanctuary
sentence 109	the	DET	det	O
sentence 109	idimuzhanganpara	ADJ	amod	feature
sentence 109	camp	PROPN	nsubj	feature
sentence 109	is	AUX	ROOT	O
sentence 109	sites	NOUN	attr	location_feature
sentence 109	in	ADP	prep	O
sentence 109	the	DET	det	O
sentence 109	shendurney	NOUN	compound	sanctuary
sentence 109	wildlife	NOUN	compound	sanctuary
sentence 109	sanctuary	NOUN	pobj	sanctuary
sentence 110	the	DET	det	O
sentence 110	pallivasal	NOUN	compound	feature
sentence 110	camp	NOUN	nsubj	feature
sentence 110	is	AUX	ROOT	O
sentence 110	sites	NOUN	attr	location_feature
sentence 110	in	ADP	prep	O
sentence 110	the	DET	det	O
sentence 110	shendurney	NOUN	compound	sanctuary
sentence 110	wildlife	NOUN	compound	sanctuary
sentence 110	sanctuary	NOUN	pobj	sanctuary
sentence 111	kollam	PROPN	compound	beach
sentence 111	beach	PROPN	nsubj	beach
sentence 111	has	VERB	ROOT	location_feature
sentence 111	the	DET	det	O
sentence 111	archaic	ADJ	amod	feature
sentence 111	grandeur	NOUN	dobj	feature
sentence 112	the	DET	det	O
sentence 112	kollam	PROPN	compound	beach
sentence 112	beach	NOUN	nsubjpass	beach
sentence 112	is	AUX	auxpass	O
sentence 112	known	VERB	ROOT	location_feature
sentence 112	as	ADP	prep	O
sentence 112	the	DET	det	O
sentence 112	mahatma	NOUN	amod	beach
sentence 112	gandhi	NOUN	compound	beach
sentence 112	beach	NOUN	pobj	beach
sentence 113	nelliyampathy	ADJ	amod	hills
sentence 113	hill	NOUN	compound	hills
sentence 113	station	NOUN	nsubjpass	hills
sentence 113	is	AUX	auxpass	O
sentence 113	situated	VERB	ROOT	loc_area
sentence 113	at	ADP	prep	O
sentence 113	the	DET	det	O
sentence 113	palakkad	NOUN	pobj	place
sentence 114	nelliyampathy	ADJ	amod	hills
sentence 114	hill	NOUN	compound	hills
sentence 114	station	NOUN	nsubj	hills
sentence 114	opens	VERB	ROOT	entry_exit
sentence 114	for	ADP	prep	O
sentence 114	24	NUM	nummod	time
sentence 114	hours	NOUN	pobj	time
sentence 115	nelliyampathy	ADJ	amod	hills
sentence 115	hill	NOUN	compound	hills
sentence 115	station	NOUN	nsubjpass	hills
sentence 115	is	AUX	auxpass	O
sentence 115	located	VERB	ROOT	loc_area
sentence 115	at	ADP	prep	O
sentence 115	the	DET	det	O
sentence 115	muthalamada	PROPN	compound	place
sentence 115	north	NOUN	pobj	place
sentence 116	nelliyampathy	ADJ	amod	hills
sentence 116	hill	NOUN	compound	hills
sentence 116	station	NOUN	nsubj	hills
sentence 116	has	VERB	ROOT	location_feature
sentence 116	1572	NUM	nummod	feature
sentence 116	meter	NOUN	compound	feature
sentence 116	hight	NOUN	dobj	feature
sentence 117	the	DET	det	O
sentence 117	nelliyampathy	ADJ	amod	hills
sentence 117	hill	NOUN	compound	hills
sentence 117	station	NOUN	nsubj	hills
sentence 117	attracts	VERB	ROOT	location_feature
sentence 117	the	DET	det	O
sentence 117	trekkers	NOUN	dobj	feature
sentence 118	the	DET	det	O
sentence 118	sitharkundu	NOUN	compound	hills
sentence 118	view	NOUN	compound	hills
sentence 118	point	NOUN	nsubjpass	hills
sentence 118	is	AUX	auxpass	O
sentence 118	situated	VERB	ROOT	loc_area
sentence 118	at	ADP	prep	O
sentence 118	the	DET	det	O
sentence 118	nelliyampathy	ADJ	amod	hills
sentence 118	hill	NOUN	compound	hills
sentence 118	statiion	NOUN	pobj	hills
sentence 119	the	DET	det	O
sentence 119	manpara	NOUN	compound	hills
sentence 119	view	NOUN	compound	hills
sentence 119	point	NOUN	nsubjpass	hills
sentence 119	is	AUX	auxpass	O
sentence 119	situated	VERB	ROOT	loc_area
sentence 119	at	ADP	prep	O
sentence 119	the	DET	det	O
sentence 119	nelliyampathy	ADJ	amod	hills
sentence 119	hill	NOUN	compound	hills
sentence 119	station	NOUN	pobj	hills
sentence 120	the	DET	det	O
sentence 120	kesavanpara	ADJ	compound	hills
sentence 120	view	NOUN	compound	hills
sentence 120	point	NOUN	nsubjpass	hills
sentence 120	is	AUX	auxpass	O
sentence 120	located	VERB	ROOT	loc_area
sentence 120	at	ADP	prep	O
sentence 120	the	DET	det	O
sentence 120	nelliyampathy	ADJ	amod	hills
sentence 120	hill	NOUN	compound	hills
sentence 120	station	NOUN	pobj	hills
sentence 121	karappara	PROPN	amod	dam
sentence 121	dam	NOUN	compound	dam
sentence 121	site	NOUN	nsubjpass	dam
sentence 121	is	AUX	auxpass	O
sentence 121	situated	VERB	ROOT	loc_area
sentence 121	at	ADP	prep	O
sentence 121	the	DET	det	O
sentence 121	nelliyampathy	ADJ	amod	hills
sentence 121	hill	NOUN	compound	hills
sentence 121	station	NOUN	pobj	hills
sentence 122	pothundy	ADJ	amod	dam
sentence 122	dam	NOUN	nsubj	dam
sentence 122	is	AUX	ROOT	O
sentence 122	enroute	NOUN	acomp	location_feature
sentence 122	to	ADP	prep	O
sentence 122	the	DET	det	O
sentence 122	nelliyambathy	ADJ	amod	hills
sentence 122	hill	NOUN	compound	hills
sentence 122	station	NOUN	pobj	hills
sentence 123	tea	NOUN	compound	feature
sentence 123	plantations	NOUN	nsubjpass	feature
sentence 123	can	AUX	aux	O
sentence 123	be	AUX	auxpass	O
sentence 123	seen	VERB	ROOT	location_feature
sentence 123	at	ADP	prep	O
sentence 123	the	DET	det	O
sentence 123	nelliyampathy	ADJ	amod	hills
sentence 123	hill	NOUN	compound	hills
sentence 123	station	NOUN	pobj	hills
sentence 124	cardamon	NOUN	compound	feature
sentence 124	plantations	NOUN	nsubjpass	feature
sentence 124	are	AUX	auxpass	O
sentence 124	located	VERB	ROOT	loc_area
sentence 124	at	ADP	prep	O
sentence 124	the	DET	det	O
sentence 124	nelliyampathy	ADJ	amod	hills
sentence 124	hill	NOUN	compound	hills
sentence 124	station	NOUN	pobj	hills
sentence 125	palakkad	ADJ	amod	place
sentence 125	fort	NOUN	nsubjpass	place
sentence 125	is	AUX	auxpass	O
sentence 125	situated	VERB	ROOT	loc_area
sentence 125	at	ADP	prep	O
sentence 125	palakkad	NOUN	pobj	place
sentence 126	palakkad	ADJ	amod	place
sentence 126	fort	NOUN	nsubjpass	place
sentence 126	was	AUX	auxpass	O
sentence 126	built	VERB	ROOT	location_feature
sentence 126	by	ADP	agent	O
sentence 126	the	DET	det	O
sentence 126	mysore	NOUN	compound	person
sentence 126	hyderali	NOUN	nmod	person
sentence 127	shendurney	PROPN	compound	sanctuary
sentence 127	wildlife	NOUN	compound	sanctuary
sentence 127	sanctuary	NOUN	nsubj	sanctuary
sentence 127	situated	VERB	ROOT	loc_area
sentence 127	at	ADP	prep	O
sentence 127	kollam	PROPN	pobj	place
sentence 128	shendurney	PROPN	compound	sanctuary
sentence 128	wildlife	NOUN	compound	sanctuary
sentence 128	sanctuary	NOUN	nsubj	sanctuary
sentence 128	is	AUX	ROOT	O
sentence 128	part	NOUN	attr	location_feature
sentence 128	of	ADP	prep	O
sentence 128	the	DET	det	O
sentence 128	agasthyamala	PROPN	compound	place
sentence 128	biosphere	PROPN	compound	place
sentence 128	reserve	PROPN	pobj	place
sentence 129	gluta	NOUN	nsubjpass	feature
sentence 129	travancorica	PROPN	nsubjpass	feature
sentence 129	can	AUX	aux	O
sentence 129	be	AUX	auxpass	O
sentence 129	seen	VERB	ROOT	location_feature
sentence 129	aboundantly	ADV	advmod	O
sentence 129	in	ADP	prep	O
sentence 129	shendurney	NOUN	compound	sanctuary
sentence 129	wildlife	NOUN	compound	sanctuary
sentence 129	sanctuary	NOUN	pobj	sanctuary
sentence 130	shendurney	NOUN	nsubjpass	place
sentence 130	is	AUX	auxpass	O
sentence 130	situated	VERB	ROOT	loc_area
sentence 130	on	ADP	prep	O
sentence 130	the	DET	det	O
sentence 130	southern	ADJ	amod	O
sentence 130	part	NOUN	pobj	location_feature
sentence 130	of	ADP	prep	O
sentence 130	the	DET	det	O
sentence 130	western	ADJ	amod	ghats
sentence 130	ghats	NOUN	pobj	ghats
sentence 131	eared	VERB	amod	feature
sentence 131	nightjar	NOUN	nsubjpass	feature
sentence 131	has	AUX	aux	O
sentence 131	also	ADV	advmod	O
sentence 131	been	AUX	auxpass	O
sentence 131	spotted	VERB	ROOT	location_feature
sentence 131	shendurney	NOUN	oprd	sanctuary
sentence 132	idimuzhanganpara	PROPN	nsubj	feature
sentence 132	is	AUX	ROOT	O
sentence 132	a	DET	det	O
sentence 132	camping	NOUN	compound	activity_center
sentence 132	sites	NOUN	attr	activity_center
sentence 132	in	ADP	prep	O
sentence 132	the	DET	det	O
sentence 132	sanctuary	NOUN	pobj	sanctuary
sentence 133	pallivasal	NOUN	nsubj	place
sentence 133	is	AUX	ROOT	O
sentence 133	a	DET	det	O
sentence 133	camping	NOUN	compound	activity_center
sentence 133	sites	NOUN	attr	activity_center
sentence 133	in	ADP	prep	O
sentence 133	the	DET	det	O
sentence 133	sanctuary	NOUN	pobj	sanctuary
sentence 134	rockwood	NOUN	nsubj	place
sentence 134	is	AUX	ROOT	O
sentence 134	a	DET	det	activity_center
sentence 134	camping	NOUN	compound	activity_center
sentence 134	sites	NOUN	attr	O
sentence 134	in	ADP	prep	O
sentence 134	the	DET	det	O
sentence 134	sanctuary	NOUN	pobj	sanctuary
sentence 135	kurunthottivalavu	PROPN	nsubj	place
sentence 135	is	AUX	ROOT	O
sentence 135	a	DET	det	O
sentence 135	camping	NOUN	compound	activity_center
sentence 135	sites	NOUN	attr	activity_center
sentence 135	in	ADP	prep	O
sentence 135	the	DET	det	O
sentence 135	sanctuary	NOUN	pobj	sanctuary
sentence 136	lake	NOUN	compound	hills
sentence 136	view	NOUN	nsubj	hills
sentence 136	is	AUX	ROOT	O
sentence 136	a	DET	det	O
sentence 136	camping	NOUN	compound	activity_center
sentence 136	sites	NOUN	attr	activity_center
sentence 136	in	ADP	prep	O
sentence 136	the	DET	det	O
sentence 136	sanctuary	NOUN	pobj	sanctuary
sentence 137	punalur	NOUN	nsubjpass	place
sentence 137	is	AUX	auxpass	O
sentence 137	located	VERB	ROOT	loc_area
sentence 137	near	ADP	prep	O
sentence 137	the	DET	det	O
sentence 137	eastern	ADJ	amod	feature
sentence 137	border	PROPN	pobj	feature
sentence 137	of	ADP	prep	O
sentence 137	kollam	PROPN	compound	place
sentence 137	district	PROPN	pobj	place
sentence 138	punalur	NOUN	nsubjpass	place
sentence 138	is	AUX	auxpass	O
sentence 138	located	VERB	ROOT	loc_area
sentence 138	in	ADP	prep	O
sentence 138	the	DET	det	O
sentence 138	bank	PROPN	pobj	O
sentence 138	of	ADP	prep	O
sentence 138	kalada	PROPN	compound	river
sentence 138	river	PROPN	pobj	river
sentence 139	punalur	NOUN	nsubj	place
sentence 139	is	AUX	ROOT	O
sentence 139	the	DET	det	O
sentence 139	largest	ADJ	amod	feature
sentence 139	hill	NOUN	compound	feature
sentence 139	city	NOUN	attr	feature
sentence 139	in	ADP	prep	O
sentence 139	india	PROPN	pobj	place
sentence 140	hanging	VERB	amod	activity_center
sentence 140	bridge	NOUN	nsubj	activity_center
sentence 140	is	AUX	ROOT	O
sentence 140	the	DET	det	O
sentence 140	highlight	NOUN	attr	location_feature
sentence 140	of	ADP	prep	O
sentence 140	punalur	NOUN	pobj	place
sentence 141	punalur	NOUN	compound	place
sentence 141	bridge	NOUN	nsubjpass	place
sentence 141	is	AUX	auxpass	O
sentence 141	called	VERB	ROOT	location_feature
sentence 141	the	DET	det	O
sentence 141	london	PROPN	compound	place
sentence 141	bridge	NOUN	oprd	place
sentence 141	of	ADP	prep	O
sentence 141	kerala	PROPN	pobj	place
sentence 142	punalur	NOUN	nsubj	place
sentence 142	is	AUX	ROOT	O
sentence 142	known	ADJ	acomp	feature
sentence 142	as	ADP	prep	O
sentence 142	the	DET	det	O
sentence 142	stopover	NOUN	pobj	activity_center
sentence 142	for	ADP	prep	O
sentence 142	sabarimala	NOUN	compound	activity_center
sentence 142	pilgrims	NOUN	pobj	activity_center
sentence 143	department	PROPN	nsubj	organization
sentence 143	of	ADP	prep	organization
sentence 143	tourism	NOUN	pobj	organization
sentence 143	has	AUX	aux	O
sentence 143	constructed	VERB	ROOT	location_feature
sentence 143	a	DET	det	O
sentence 143	bathing	NOUN	compound	activity_center
sentence 143	ghat	ADP	dobj	activity_center
sentence 143	on	ADP	prep	O
sentence 143	the	DET	det	O
sentence 143	shores	NOUN	pobj	location_feature
sentence 143	of	ADP	prep	O
sentence 143	the	DET	det	O
sentence 143	kallada	NOUN	pobj	river
sentence 144	punalur	NOUN	nsubj	place
sentence 144	will	AUX	aux	O
sentence 144	provides	VERB	ROOT	location_feature
sentence 144	food	NOUN	nmod	feature
sentence 144	and	CCONJ	cc	O
sentence 144	accommodation	NOUN	conj	feature
sentence 144	facilities	NOUN	dobj	feature
sentence 144	to	ADP	prep	O
sentence 144	the	DET	det	O
sentence 144	pilgrims	NOUN	pobj	person
sentence 145	kollam	PROPN	compound	beach
sentence 145	beach	PROPN	nsubj	beach
sentence 145	is	AUX	ROOT	O
sentence 145	the	DET	det	O
sentence 145	quintessential	ADJ	amod	location_feature
sentence 145	beach	NOUN	compound	location_feature
sentence 145	destination	NOUN	attr	location_feature
sentence 145	for	ADP	prep	O
sentence 145	travellers	NOUN	pobj	person
sentence 146	kollam	PROPN	compound	beach
sentence 146	beach	PROPN	nsubj	beach
sentence 146	has	VERB	ROOT	location_feature
sentence 146	archaic	ADJ	amod	feature
sentence 146	grandeur	NOUN	dobj	feature
sentence 147	the	DET	det	O
sentence 147	pazhassi	PROPN	compound	place
sentence 147	raja	NOUN	compound	place
sentence 147	museum	NOUN	nsubjpass	place
sentence 147	is	AUX	auxpass	O
sentence 147	situated	VERB	ROOT	loc_area
sentence 147	at	ADP	prep	O
sentence 147	calicut	NOUN	pobj	place
sentence 148	the	DET	det	O
sentence 148	thikkoti	PROPN	nmod	place
sentence 148	light	ADJ	compound	place
sentence 148	house	NOUN	nsubjpass	place
sentence 148	is	AUX	auxpass	O
sentence 148	situated	VERB	ROOT	loc_area
sentence 148	at	ADP	prep	O
sentence 148	calicut	NOUN	pobj	place
sentence 149	the	DET	det	O
sentence 149	kozhikode	PROPN	compound	beach
sentence 149	beach	NOUN	nsubjpass	beach
sentence 149	is	AUX	auxpass	O
sentence 149	situated	VERB	ROOT	loc_area
sentence 149	at	ADP	prep	O
sentence 149	calicut	NOUN	pobj	place
sentence 150	the	DET	det	O
sentence 150	maOchira	PROPN	compound	activity_center
sentence 150	square	PROPN	nsubjpass	activity_center
sentence 150	is	AUX	auxpass	O
sentence 150	situated	VERB	ROOT	loc_area
sentence 150	at	ADP	prep	O
sentence 150	calicut	NOUN	pobj	place
sentence 151	the	DET	det	O
sentence 151	beypore	NOUN	nsubjpass	place
sentence 151	is	AUX	auxpass	O
sentence 151	situated	VERB	ROOT	loc_area
sentence 151	at	ADP	prep	O
sentence 151	calicut	NOUN	pobj	place
sentence 152	the	DET	det	O
sentence 152	kadalundi	PROPN	compound	sanctuary
sentence 152	bird	NOUN	compound	sanctuary
sentence 152	sanctuary	NOUN	nsubjpass	sanctuary
sentence 152	is	AUX	auxpass	O
sentence 152	situated	VERB	ROOT	loc_area
sentence 152	at	ADP	prep	O
sentence 152	calicut	NOUN	pobj	place
sentence 153	the	DET	det	O
sentence 153	thali	PROPN	amod	temple
sentence 153	temple	PROPN	nsubjpass	temple
sentence 153	is	AUX	auxpass	O
sentence 153	situated	VERB	ROOT	loc_area
sentence 153	at	ADP	prep	O
sentence 153	calicut	NOUN	pobj	place
sentence 154	the	DET	det	O
sentence 154	calicut	NOUN	compound	place
sentence 154	planetarium	NOUN	nsubjpass	place
sentence 154	is	AUX	auxpass	O
sentence 154	situated	VERB	ROOT	loc_area
sentence 154	at	ADP	prep	O
sentence 154	calicut	NOUN	pobj	place
sentence 155	the	DET	det	O
sentence 155	mishkal	PROPN	compound	place
sentence 155	mosque	NOUN	nsubjpass	place
sentence 155	is	AUX	auxpass	O
sentence 155	situated	VERB	ROOT	loc_area
sentence 155	at	ADP	prep	O
sentence 155	calicut	NOUN	pobj	place
sentence 156	the	DET	det	O
sentence 156	mother	NOUN	nsubjpass	place
sentence 156	of	ADP	prep	place
sentence 156	god	PROPN	compound	place
sentence 156	cathedral	PROPN	pobj	place
sentence 156	is	AUX	auxpass	O
sentence 156	situated	VERB	ROOT	loc_area
sentence 156	at	ADP	prep	O
sentence 156	calicut	NOUN	pobj	place
sentence 157	the	DET	det	O
sentence 157	peruvannamuzhi	ADJ	compound	dam
sentence 157	dam	NOUN	nsubjpass	dam
sentence 157	is	AUX	auxpass	O
sentence 157	situated	VERB	ROOT	loc_area
sentence 157	at	ADP	prep	O
sentence 157	calicut	NOUN	pobj	place
sentence 158	the	DET	det	O
sentence 158	krishna	NOUN	compound	place
sentence 158	menon	PROPN	compound	place
sentence 158	museum	NOUN	nsubjpass	place
sentence 158	is	AUX	auxpass	O
sentence 158	situated	VERB	ROOT	loc_area
sentence 158	at	ADP	prep	O
sentence 158	calicut	NOUN	pobj	place
sentence 159	the	DET	det	O
sentence 159	lion	NOUN	poss	activity_center
sentence 159	’s	PART	case	activity_center
sentence 159	park	NOUN	nsubjpass	activity_center
sentence 159	is	AUX	auxpass	O
sentence 159	situated	VERB	ROOT	loc_area
sentence 159	at	ADP	prep	O
sentence 159	calicut	NOUN	pobj	place
sentence 160	the	DET	det	O
sentence 160	kozhippara	PROPN	nsubj	waterfalls
sentence 160	falls	VERB	nsubjpass	waterfalls
sentence 160	is	AUX	auxpass	O
sentence 160	situated	VERB	ROOT	loc_area
sentence 160	at	ADP	prep	O
sentence 160	calicut	NOUN	pobj	place
sentence 161	the	DET	det	O
sentence 161	thusharagiri	NOUN	nsubj	waterfalls
sentence 161	falls	VERB	nsubjpass	waterfalls
sentence 161	is	AUX	auxpass	O
sentence 161	situated	VERB	ROOT	place
sentence 161	at	ADP	prep	O
sentence 161	calicut	NOUN	pobj	place
sentence 161	the	DET	det	O
sentence 162	kakkayam	PROPN	compound	dam
sentence 162	dam	NOUN	nsubjpass	dam
sentence 162	is	AUX	auxpass	O
sentence 162	situated	VERB	ROOT	loc_area
sentence 162	at	ADP	prep	O
sentence 162	calicut	NOUN	pobj	place
sentence 163	the	DET	det	O
sentence 163	sweet	ADJ	amod	place
sentence 163	street	NOUN	nsubjpass	place
sentence 163	is	AUX	auxpass	O
sentence 163	situated	VERB	ROOT	loc_area
sentence 163	at	ADP	prep	O
sentence 163	calicut	NOUN	pobj	place
sentence 164	the	DET	det	O
sentence 164	elathur	PROPN	nsubjpass	place
sentence 164	is	AUX	auxpass	O
sentence 164	situated	VERB	ROOT	loc_area
sentence 164	at	ADP	prep	O
sentence 164	calicut	NOUN	pobj	place
sentence 165	the	DET	det	O
sentence 165	vellari	PROPN	compound	hills
sentence 165	mala	PROPN	nsubjpass	hills
sentence 165	is	AUX	auxpass	O
sentence 165	situated	VERB	ROOT	loc_area
sentence 165	at	ADP	prep	O
sentence 165	calicut	NOUN	pobj	place
sentence 166	the	DET	det	O
sentence 166	sargaalaya	NOUN	compound	place
sentence 166	kerala	PROPN	compound	place
sentence 166	arts	NOUN	nsubjpass	place
sentence 166	is	AUX	auxpass	O
sentence 166	situated	VERB	ROOT	loc_area
sentence 166	at	ADP	prep	O
sentence 166	calicut	NOUN	pobj	place
sentence 167	the	DET	det	O
sentence 167	kappad	PROPN	compound	beach
sentence 167	beach	NOUN	nsubjpass	beach
sentence 167	is	AUX	auxpass	O
sentence 167	situated	VERB	ROOT	loc_area
sentence 167	at	ADP	prep	O
sentence 167	calicut	NOUN	pobj	place
sentence 168	the	DET	det	O
sentence 168	canoli	PROPN	compound	place
sentence 168	canal	NOUN	nsubjpass	place
sentence 168	is	AUX	auxpass	O
sentence 168	situated	VERB	ROOT	loc_area
sentence 168	at	ADP	prep	O
sentence 168	calicut	NOUN	pobj	place
sentence 169	the	DET	det	O
sentence 169	kallai	PROPN	compound	river
sentence 169	river	PROPN	nsubjpass	river
sentence 169	is	AUX	auxpass	O
sentence 169	situated	VERB	ROOT	place
sentence 169	at	ADP	prep	O
sentence 169	calicut	NOUN	pobj	place
sentence 170	the	DET	det	O
sentence 170	payyoli	NOUN	nsubjpass	place
sentence 170	is	AUX	auxpass	O
sentence 170	situated	VERB	ROOT	loc_area
sentence 170	at	ADP	prep	O
sentence 170	calicut	NOUN	pobj	place
sentence 171	the	DET	det	O
sentence 171	muchundi	PROPN	compound	place
sentence 171	mosque	PROPN	nsubjpass	mosque
sentence 171	is	AUX	auxpass	O
sentence 171	situated	VERB	ROOT	loc_area
sentence 171	at	ADP	prep	O
sentence 171	calicut	NOUN	pobj	place
sentence 172	the	DET	det	O
sentence 172	lokanarkavu	PROPN	compound	temple
sentence 172	temple	PROPN	nsubjpass	temple
sentence 172	is	AUX	auxpass	O
sentence 172	situated	VERB	ROOT	place
sentence 172	at	ADP	prep	O
sentence 172	calicut	NOUN	pobj	place
sentence 173	the	DET	det	O
sentence 173	azhakodidevi	ADJ	amod	temple
sentence 173	temple	NOUN	nsubjpass	temple
sentence 173	is	AUX	auxpass	O
sentence 173	situated	VERB	ROOT	loc_area
sentence 173	at	ADP	prep	O
sentence 173	calicut	NOUN	pobj	place
sentence 174	the	DET	det	O
sentence 174	valayanad	PROPN	compound	temple
sentence 174	temple	PROPN	nsubjpass	temple
sentence 174	is	AUX	auxpass	O
sentence 174	situated	VERB	ROOT	loc_area
sentence 174	at	ADP	prep	O
sentence 174	calicut	NOUN	pobj	place
sentence 175	the	DET	det	O
sentence 175	hilite	PROPN	compound	activity_center
sentence 175	mall	NOUN	nsubjpass	activity_center
sentence 175	is	AUX	auxpass	O
sentence 175	situated	VERB	ROOT	loc_area
sentence 175	at	ADP	prep	O
sentence 175	calicut	NOUN	pobj	place
sentence 176	the	DET	det	O
sentence 176	focus	NOUN	compound	activity_center
sentence 176	mall	NOUN	nsubjpass	activity_center
sentence 176	is	AUX	auxpass	O
sentence 176	situated	VERB	ROOT	loc_area
sentence 176	at	ADP	prep	O
sentence 176	calicut	NOUN	pobj	place
sentence 177	nelliyampathy	ADJ	amod	hills
sentence 177	hill	NOUN	compound	hills
sentence 177	station	NOUN	nsubj	hills
sentence 177	is	AUX	ROOT	O
sentence 177	1572	NUM	nummod	feature
sentence 177	m	NOUN	attr	feature
sentence 177	above	ADP	prep	feature
sentence 177	sea	NOUN	compound	feature
sentence 177	level	NOUN	pobj	feature
sentence 178	nelliyampathy	ADJ	amod	hills
sentence 178	hill	NOUN	compound	hills
sentence 178	station	NOUN	nsubj	hills
sentence 178	is	AUX	ROOT	O
sentence 178	the	DET	det	O
sentence 178	delight	NOUN	attr	location_feature
sentence 178	of	ADP	prep	location_feature
sentence 178	trekkers	NOUN	pobj	person
sentence 179	sitharkundu	NOUN	compound	hills
sentence 179	view	NOUN	compound	hills
sentence 179	point	NOUN	nsubjpass	hills
sentence 179	is	AUX	auxpass	O
sentence 179	situated	VERB	ROOT	loc_area
sentence 179	at	ADP	prep	O
sentence 179	nelliyampathy	ADJ	amod	hills
sentence 179	hill	NOUN	compound	hills
sentence 179	statiion	NOUN	pobj	hills
sentence 180	manpara	PROPN	compound	hills
sentence 180	view	NOUN	compound	hills
sentence 180	point	NOUN	nsubjpass	hills
sentence 180	is	AUX	auxpass	O
sentence 180	situated	VERB	ROOT	loc_area
sentence 180	at	ADP	prep	O
sentence 180	nelliyampathy	ADJ	amod	hills
sentence 180	hill	NOUN	compound	hills
sentence 180	station	NOUN	pobj	hills
sentence 181	kesavanpara	PROPN	compound	hills
sentence 181	view	NOUN	compound	hills
sentence 181	point	NOUN	nsubjpass	hills
sentence 181	is	AUX	auxpass	O
sentence 181	situated	VERB	ROOT	loc_area
sentence 181	at	ADP	prep	O
sentence 181	nelliyampathy	ADJ	amod	hills
sentence 181	hill	NOUN	compound	hills
sentence 181	station	NOUN	pobj	hills
sentence 182	victoria	PROPN	compound	hills
sentence 182	church	PROPN	compound	hills
sentence 182	hills	PROPN	nsubjpass	hills
sentence 182	is	AUX	auxpass	O
sentence 182	situated	VERB	ROOT	loc_area
sentence 182	at	ADP	prep	O
sentence 182	nelliyampathy	ADJ	amod	hills
sentence 182	hill	NOUN	compound	hills
sentence 182	station	NOUN	pobj	hills
sentence 183	karappara	PROPN	amod	dam
sentence 183	dam	NOUN	compound	dam
sentence 183	is	AUX	auxpass	O
sentence 183	situated	VERB	ROOT	loc_area
sentence 183	at	ADP	prep	O
sentence 183	nelliyampathy	ADJ	amod	hills
sentence 183	hill	NOUN	compound	hills
sentence 183	station	NOUN	pobj	hills
sentence 184	pothundy	ADJ	amod	dam
sentence 184	dam	NOUN	nsubj	dam
sentence 184	is	AUX	ROOT	O
sentence 184	en	ADJ	acomp	location_feature
sentence 184	route	NOUN	attr	location_feature
sentence 184	to	ADP	prep	O
sentence 184	nelliyambathy	ADJ	amod	hills
sentence 184	hill	NOUN	compound	hills
sentence 184	station	NOUN	pobj	hills
sentence 185	karassuri	PROPN	nsubj	place
sentence 185	is	AUX	ROOT	O
sentence 185	a	PROPN	compound	O
sentence 185	trekking	NOUN	compound	location_feature
sentence 185	option	NOUN	attr	location_feature
sentence 185	in	ADP	prep	O
sentence 185	nelliyampathy	ADJ	amod	place
sentence 186	tea	NOUN	compound	feature
sentence 186	plantations	NOUN	nsubj	feature
sentence 186	are	AUX	ROOT	O
sentence 186	the	DET	det	O
sentence 186	attractions	NOUN	attr	location_feature
sentence 186	of	ADP	prep	O
sentence 186	nelliyampathy	ADJ	amod	hills
sentence 186	hill	NOUN	compound	hills
sentence 186	station	NOUN	pobj	hills
sentence 187	cardamon	NOUN	compound	feature
sentence 187	plantations	NOUN	nsubj	feature
sentence 187	are	AUX	ROOT	O
sentence 187	the	DET	det	O
sentence 187	attractions	NOUN	attr	location_feature
sentence 187	of	ADP	prep	O
sentence 187	nelliyampathy	ADJ	amod	hills
sentence 187	hill	NOUN	compound	hills
sentence 187	station	NOUN	pobj	hills
sentence 188	coffee	NOUN	compound	feature
sentence 188	plantations	NOUN	nsubj	feature
sentence 188	are	AUX	ROOT	O
sentence 188	the	DET	det	O
sentence 188	attractions	NOUN	attr	location_feature
sentence 188	of	ADP	prep	O
sentence 188	nelliyampathy	ADJ	amod	hills
sentence 188	hill	NOUN	compound	hills
sentence 188	station	NOUN	pobj	hills
sentence 189	palakkad	ADJ	amod	place
sentence 189	fort	NOUN	nsubjpass	place
sentence 189	is	AUX	auxpass	O
sentence 189	situated	VERB	ROOT	loc_area
sentence 189	at	ADP	prep	O
sentence 189	palakkad	NOUN	pobj	place
sentence 190	palakkad	ADJ	amod	place
sentence 190	fort	NOUN	nsubjpass	place
sentence 190	was	AUX	auxpass	O
sentence 190	built	VERB	ROOT	location_feature
sentence 190	by	ADP	agent	O
sentence 190	mysore	NOUN	amod	person
sentence 190	hyder	NOUN	compound	person
sentence 190	ali	PROPN	compound	person
sentence 191	palakkad	ADJ	amod	place
sentence 191	fort	NOUN	nsubjpass	place
sentence 191	was	AUX	auxpass	O
sentence 191	built	VERB	ROOT	location_feature
sentence 191	in	ADP	prep	O
sentence 191	1766	NUM	pobj	year
sentence 192	palakkad	ADJ	amod	place
sentence 192	fort	NOUN	nsubjpass	place
sentence 192	is	AUX	auxpass	O
sentence 192	preserved	VERB	ROOT	location_feature
sentence 192	by	ADP	agent	O
sentence 192	archeological	ADJ	amod	organization
sentence 192	survey	NOUN	pobj	organization
sentence 192	of	ADP	prep	organization
sentence 192	india	PROPN	pobj	organization
sentence 193	temple	PROPN	nsubjpass	temple
sentence 193	of	ADP	prep	temple
sentence 193	lord	PROPN	compound	temple
sentence 193	hanuman	NOUN	pobj	temple
sentence 193	is	AUX	auxpass	O
sentence 193	situated	VERB	ROOT	loc_area
sentence 193	near	ADV	advmod	O
sentence 193	to	PART	aux	O
sentence 193	palakkad	VERB	advcl	place
sentence 193	fort	NOUN	advmod	place
sentence 194	a	DET	det	O
sentence 194	museum	NOUN	nsubj	feature
sentence 194	of	ADP	prep	feature
sentence 194	archeology	NOUN	pobj	feature
sentence 194	is	AUX	aux	O
sentence 194	functioning	VERB	ROOT	location_feature
sentence 194	inside	ADP	prep	location_feature
sentence 194	the	DET	det	O
sentence 194	palakkad	ADJ	amod	place
sentence 194	fort	NOUN	pobj	place
sentence 195	a	DET	det	O
sentence 195	jogging	VERB	amod	feature
sentence 195	track	NOUN	nsubjpass	feature
sentence 195	is	AUX	auxpass	O
sentence 195	built	VERB	ROOT	location_feature
sentence 195	at	ADP	prep	O
sentence 195	palakkad	ADJ	amod	place
sentence 195	fort	NOUN	pobj	place
sentence 196	parambikulam	PROPN	compound	sanctuary
sentence 196	wildlife	PROPN	compound	sanctuary
sentence 196	sanctuary	PROPN	nsubjpass	sanctuary
sentence 196	is	AUX	auxpass	O
sentence 196	situated	VERB	ROOT	loc_area
sentence 196	at	ADP	prep	O
sentence 196	palakkad	NOUN	pobj	place
sentence 197	oldest	ADJ	nsubjpass	feature
sentence 197	and	CCONJ	cc	O
sentence 197	the	DET	det	O
sentence 197	largest	ADJ	amod	feature
sentence 197	teak	ADJ	amod	feature
sentence 197	trees	NOUN	conj	feature
sentence 197	can	AUX	aux	O
sentence 197	be	AUX	auxpass	O
sentence 197	seen	VERB	ROOT	location_feature
sentence 197	here	ADV	advmod	O
sentence 198	boating	VERB	amod	feature
sentence 198	facilities	NOUN	nsubj	feature
sentence 198	are	AUX	ROOT	O
sentence 198	available	ADJ	acomp	location_feature
sentence 198	at	ADP	prep	O
sentence 198	the	DET	det	O
sentence 198	parambikulam	PROPN	compound	sanctuary
sentence 198	reservoir	PROPN	pobj	sanctuary
sentence 199	cruising	VERB	amod	feature
sentence 199	facilities	NOUN	nsubj	feature
sentence 199	are	AUX	ROOT	O
sentence 199	available	ADJ	acomp	location_feature
sentence 199	at	ADP	prep	O
sentence 199	the	DET	det	O
sentence 199	parambikulam	PROPN	compound	sanctuary
sentence 199	reservoir	PROPN	pobj	sanctuary
sentence 200	rest	NOUN	compound	feature
sentence 200	houses	NOUN	nsubjpass	feature
sentence 200	of	ADP	prep	O
sentence 200	the	DET	det	O
sentence 200	state	NOUN	compound	organization
sentence 200	forest	NOUN	compound	organization
sentence 200	department	NOUN	pobj	organization
sentence 200	is	AUX	auxpass	O
sentence 200	situated	VERB	ROOT	loc_area
sentence 200	at	ADP	prep	O
sentence 200	thunakkadavu	NOUN	pobj	place
sentence 201	rest	NOUN	compound	feature
sentence 201	houses	NOUN	nsubjpass	feature
sentence 201	of	ADP	prep	O
sentence 201	the	DET	det	O
sentence 201	state	NOUN	compound	organization
sentence 201	forest	NOUN	compound	organization
sentence 201	department	NOUN	pobj	organization
sentence 201	is	AUX	auxpass	O
sentence 201	situated	VERB	ROOT	loc_area
sentence 201	at	ADP	prep	O
sentence 201	anappady	ADV	pcomp	place
sentence 202	rest	NOUN	compound	feature
sentence 202	houses	NOUN	nsubjpass	feature
sentence 202	of	ADP	prep	O
sentence 202	the	DET	det	O
sentence 202	state	NOUN	compound	organization
sentence 202	forest	NOUN	compound	organization
sentence 202	department	NOUN	pobj	organization
sentence 202	is	AUX	auxpass	O
sentence 202	situated	VERB	ROOT	loc_area
sentence 202	at	ADP	prep	O
sentence 202	illikkal	NOUN	pobj	place
sentence 203	anappady	ADV	advmod	place
sentence 203	is	AUX	auxpass	O
sentence 203	situated	VERB	ROOT	loc_area
sentence 203	at	ADP	prep	O
sentence 203	parambikulam	PROPN	pobj	place
sentence 204	illikkal	NOUN	nsubjpass	place
sentence 204	is	AUX	auxpass	O
sentence 204	situated	VERB	ROOT	loc_area
sentence 204	at	ADP	prep	O
sentence 204	parambikulam	PROPN	pobj	place
sentence 205	thunakkadavu	PROPN	nsubjpass	place
sentence 205	is	AUX	auxpass	O
sentence 205	situated	VERB	ROOT	loc_area
sentence 205	at	ADP	prep	O
sentence 205	parambikulam	PROPN	pobj	place
sentence 206	the	DET	det	O
sentence 206	silent	PROPN	amod	place
sentence 206	valley	PROPN	compound	place
sentence 206	is	AUX	auxpass	O
sentence 206	situated	VERB	ROOT	loc_area
sentence 206	at	ADP	prep	O
sentence 206	palakkad	NOUN	pobj	place
sentence 207	kunthipuzha	NOUN	compound	river
sentence 207	river	NOUN	nsubj	river
sentence 207	is	AUX	ROOT	O
sentence 207	flows	NOUN	attr	location_feature
sentence 207	through	ADP	prep	location_feature
sentence 207	silent	ADJ	amod	place
sentence 207	valley	PROPN	compound	place
sentence 208	the	DET	det	O
sentence 208	silent	ADJ	amod	place
sentence 208	valley	NOUN	nsubj	place
sentence 208	is	AUX	ROOT	O
sentence 208	a	DET	det	O
sentence 208	tropical	ADJ	amod	feature
sentence 208	rain	NOUN	compound	feature
sentence 208	forest	NOUN	attr	feature
sentence 208	in	ADP	prep	O
sentence 208	kerala	PROPN	pobj	place
sentence 209	the	DET	det	O
sentence 209	silent	ADJ	amod	place
sentence 209	valley	NOUN	nsubj	place
sentence 209	is	AUX	ROOT	O
sentence 209	best	ADJ	acomp	location_feature
sentence 209	for	ADP	prep	O
sentence 209	the	DET	det	O
sentence 209	nature	NOUN	compound	feature
sentence 209	lovers	NOUN	pobj	feature
sentence 210	the	DET	det	O
sentence 210	icadas	NOUN	nsubj	feature
sentence 210	are	AUX	ROOT	O
sentence 210	absent	ADJ	acomp	location_feature
sentence 210	in	ADP	prep	O
sentence 210	the	DET	det	O
sentence 210	silent	ADJ	amod	place
sentence 210	valley	NOUN	pobj	place
sentence 211	the	DET	det	O
sentence 211	silent	ADJ	amod	place
sentence 211	valley	PROPN	nsubjpass	place
sentence 211	is	AUX	auxpass	O
sentence 211	inaugurated	VERB	ROOT	location_feature
sentence 211	in	ADP	prep	O
sentence 211	1985	NUM	pobj	year
sentence 212	the	DET	det	O
sentence 212	silent	ADJ	amod	place
sentence 212	valley	NOUN	nsubj	place
sentence 212	is	AUX	ROOT	O
sentence 212	a	DET	det	O
sentence 212	part	NOUN	attr	location_feature
sentence 212	of	ADP	prep	O
sentence 212	the	DET	det	O
sentence 212	nilgiri	NOUN	pobj	place
sentence 212	subcluster	NOUN	attr	place
sentence 213	the	DET	det	O
sentence 213	silent	ADJ	amod	place
sentence 213	valley	PROPN	nsubjpass	place
sentence 213	is	AUX	auxpass	O
sentence 213	recognised	VERB	ROOT	location_feature
sentence 213	by	ADP	agent	O
sentence 213	unesco	PROPN	pobj	organization
sentence 213	in	ADP	prep	O
sentence 213	2012	NUM	pobj	year
sentence 214	the	DET	det	O
sentence 214	mukkali	NOUN	nsubj	place
sentence 214	is	AUX	ROOT	O
sentence 214	the	DET	det	O
sentence 214	entry	NOUN	attr	location_feature
sentence 214	of	ADP	prep	O
sentence 214	the	DET	det	O
sentence 214	silent	ADJ	amod	place
sentence 214	valley	NOUN	pobj	place
sentence 215	the	DET	det	O
sentence 215	silent	ADJ	amod	place
sentence 215	valley	PROPN	nsubj	place
sentence 215	has	AUX	aux	O
sentence 215	reuire	VERB	ROOT	location_feature
sentence 215	prior	ADJ	amod	feature
sentence 215	booking	NOUN	dobj	feature
sentence 216	the	DET	det	O
sentence 216	silent	ADJ	amod	place
sentence 216	valley	PROPN	nsubj	place
sentence 216	has	VERB	ROOT	location_feature
sentence 216	elephant	ADJ	amod	feature
sentence 216	habitat	NOUN	dobj	feature
sentence 217	the	DET	det	O
sentence 217	silent	ADJ	amod	place
sentence 217	valley	PROPN	nsubj	place
sentence 217	has	VERB	ROOT	location_feature
sentence 217	tiger	NOUN	compound	feature
sentence 217	habitat	NOUN	dobj	feature
sentence 218	the	DET	det	O
sentence 218	silent	ADJ	amod	place
sentence 218	valley	PROPN	nsubj	place
sentence 218	has	VERB	ROOT	location_feature
sentence 218	leopards	NOUN	dobj	feature
sentence 219	the	DET	det	O
sentence 219	silent	ADJ	amod	place
sentence 219	valley	PROPN	nsubj	place
sentence 219	has	VERB	ROOT	location_feature
sentence 219	different	ADJ	amod	feature
sentence 219	snakes	NOUN	dobj	feature
sentence 220	the	DET	det	O
sentence 220	silent	ADJ	amod	place
sentence 220	valley	PROPN	nsubj	place
sentence 220	has	VERB	ROOT	location_feature
sentence 220	malabar	ADJ	compound	feature
sentence 220	giant	NOUN	amod	feature
sentence 220	squirrels	VERB	ccomp	feature
sentence 220	habitat	NOUN	dobj	feature
sentence 221	the	DET	det	O
sentence 221	silent	ADJ	amod	place
sentence 221	valley	PROPN	nsubj	place
sentence 221	has	VERB	ROOT	location_feature
sentence 221	nilgiri	NOUN	compound	feature
sentence 221	langurs	NOUN	dobj	feature
sentence 222	the	DET	det	O
sentence 222	silent	ADJ	amod	place
sentence 222	valley	PROPN	nsubj	place
sentence 222	has	VERB	ROOT	location_feature
sentence 222	different	ADJ	amod	feature
sentence 222	kind	ADJ	amod	feature
sentence 222	insects	NOUN	dobj	feature
sentence 223	indigenous	ADJ	amod	feature
sentence 223	tribal	ADJ	amod	feature
sentence 223	groups	NOUN	nsubj	feature
sentence 223	live	VERB	ROOT	location_feature
sentence 223	within	ADP	prep	O
sentence 223	the	DET	det	O
sentence 223	silent	ADJ	amod	place
sentence 223	valley	PROPN	compound	place
sentence 224	kalpathy	PROPN	amod	place
sentence 224	village	NOUN	nsubjpass	place
sentence 224	is	AUX	auxpass	O
sentence 224	situated	VERB	ROOT	loc_area
sentence 224	at	ADP	prep	O
sentence 224	palakkad	NOUN	pobj	place
sentence 225	the	DET	det	O
sentence 225	kalpathy	PROPN	compound	place
sentence 225	village	NOUN	nsubj	place
sentence 225	consists	VERB	ROOT	location_feature
sentence 225	of	ADP	prep	O
sentence 225	22.36	NUM	nummod	feature
sentence 225	hectares	NOUN	pobj	feature
sentence 226	kalpathy	ADJ	amod	feature
sentence 226	language	NOUN	nsubjpass	feature
sentence 226	is	AUX	auxpass	O
sentence 226	intervened	VERB	ROOT	location_feature
sentence 226	between	ADP	prep	location_feature
sentence 226	tamil	NOUN	pobj	feature
sentence 226	and	CCONJ	cc	O
sentence 226	malayalam	NOUN	conj	feature
sentence 227	the	DET	det	O
sentence 227	kolam	PROPN	compound	feature
sentence 227	designs	NOUN	ROOT	feature
sentence 227	made	VERB	acl	location_feature
sentence 227	with	ADP	prep	O
sentence 227	the	DET	det	O
sentence 227	rice	NOUN	compound	feature
sentence 227	batter	NOUN	pobj	feature
sentence 228	kolam	PROPN	nsubj	feature
sentence 228	has	AUX	aux	O
sentence 228	pictured	VERB	ROOT	location_feature
sentence 228	in	ADP	prep	O
sentence 228	kalpathy	PROPN	compound	place
sentence 228	streets	NOUN	pobj	place
sentence 229	vishwanatha	NOUN	nmod	temple
sentence 229	swamy	ADJ	amod	temple
sentence 229	temple	NOUN	nsubjpass	temple
sentence 229	is	AUX	auxpass	O
sentence 229	situated	VERB	ROOT	loc_area
sentence 229	at	ADP	prep	O
sentence 229	kalpathy	PROPN	compound	place
sentence 229	village	NOUN	pobj	place
sentence 230	kalpathy	PROPN	compound	river
sentence 230	river	PROPN	nsubj	river
sentence 230	is	AUX	ROOT	O
sentence 230	flows	NOUN	attr	location_feature
sentence 230	through	ADP	prep	location_feature
sentence 230	kalpathy	PROPN	compound	place
sentence 230	village	NOUN	pobj	place
sentence 231	rathotsavam	PROPN	compound	feature
sentence 231	festival	NOUN	nsubj	feature
sentence 231	is	AUX	ROOT	O
sentence 231	famous	ADJ	acomp	location_feature
sentence 231	in	ADP	prep	O
sentence 231	kalpathy	NOUN	pobj	place
sentence 232	malambuzha	ADJ	amod	dam
sentence 232	dam	NOUN	nsubjpass	dam
sentence 232	is	AUX	auxpass	O
sentence 232	situated	VERB	ROOT	loc_area
sentence 232	at	ADP	prep	O
sentence 232	palakkad	NOUN	pobj	place
sentence 233	malambuzha	ADJ	amod	dam
sentence 233	dam	NOUN	nsubjpass	dam
sentence 233	is	AUX	auxpass	O
sentence 233	built	VERB	ROOT	location_feature
sentence 233	by	ADP	agent	O
sentence 233	madras	NOUN	compound	organization
sentence 233	state	NOUN	pobj	organization
sentence 234	malambuzha	ADJ	amod	dam
sentence 234	dam	NOUN	nsubjpass	dam
sentence 234	is	AUX	auxpass	O
sentence 234	situated	VERB	ROOT	loc_area
sentence 234	between	ADP	prep	O
sentence 234	western	ADJ	amod	ghats
sentence 234	ghats	NOUN	pobj	ghats
sentence 235	malambuzha	PROPN	amod	dam
sentence 235	dam	NOUN	compound	dam
sentence 235	wall	NOUN	nsubj	dam
sentence 235	is	AUX	ROOT	location_feature
sentence 235	of	ADP	prep	O
sentence 235	355	NUM	nummod	feature
sentence 235	feet	NOUN	npadvmod	feature
sentence 235	high	ADJ	amod	feature
sentence 236	malambuzha	ADJ	amod	dam
sentence 236	dam	NOUN	nsubjpass	dam
sentence 236	is	AUX	auxpass	O
sentence 236	built	VERB	ROOT	location_feature
sentence 236	in	ADP	prep	O
sentence 236	the	DET	det	O
sentence 236	malampuzha	PROPN	compound	river
sentence 236	river	NOUN	pobj	river
sentence 237	entrance	NOUN	compound	feature
sentence 237	garden	NOUN	nsubj	feature
sentence 237	is	AUX	ROOT	O
sentence 237	the	DET	det	O
sentence 237	main	ADJ	amod	O
sentence 237	attraction	NOUN	attr	location_feature
sentence 237	of	ADP	prep	O
sentence 237	malambuzha	VERB	amod	dam
sentence 237	dam	NOUN	pobj	dam
sentence 238	yakshi	PROPN	compound	feature
sentence 238	garden	PROPN	nsubj	feature
sentence 238	is	AUX	ROOT	O
sentence 238	the	DET	det	O
sentence 238	main	ADJ	amod	O
sentence 238	attraction	NOUN	attr	location_feature
sentence 238	of	ADP	prep	O
sentence 238	malambuzha	VERB	amod	dam
sentence 238	dam	NOUN	pobj	dam
sentence 239	japanese	ADJ	amod	feature
sentence 239	garden	NOUN	nsubj	feature
sentence 239	is	AUX	ROOT	O
sentence 239	the	DET	det	O
sentence 239	main	ADJ	amod	O
sentence 239	attraction	NOUN	attr	location_feature
sentence 239	of	ADP	prep	O
sentence 239	malambuzha	VERB	amod	dam
sentence 239	dam	NOUN	pobj	dam
sentence 240	viewpoint	NOUN	conj	hills
sentence 240	is	AUX	ROOT	O
sentence 240	the	DET	det	O
sentence 240	main	ADJ	amod	O
sentence 240	attraction	NOUN	attr	location_feature
sentence 240	of	ADP	prep	O
sentence 240	malambuzha	VERB	amod	dam
sentence 240	dam	NOUN	pobj	dam
sentence 241	cable	NOUN	compound	feature
sentence 241	car	NOUN	compound	feature
sentence 241	ride	NOUN	nsubj	feature
sentence 241	is	AUX	ROOT	O
sentence 241	the	DET	det	O
sentence 241	main	ADJ	amod	O
sentence 241	attraction	NOUN	attr	location_feature
sentence 241	of	ADP	prep	O
sentence 241	malambuzha	VERB	amod	dam
sentence 241	dam	NOUN	pobj	dam
sentence 242	fish	NOUN	nsubj	feature
sentence 242	shaped	VERB	csubj	feature
sentence 242	aquarium	NOUN	dobj	feature
sentence 242	is	AUX	ROOT	O
sentence 242	the	DET	det	O
sentence 242	main	ADJ	amod	O
sentence 242	attraction	NOUN	attr	location_feature
sentence 242	of	ADP	prep	O
sentence 242	malambuzha	VERB	amod	dam
sentence 242	dam	NOUN	pobj	dam
sentence 243	toy	NOUN	compound	feature
sentence 243	train	NOUN	nsubj	feature
sentence 243	for	ADP	prep	O
sentence 243	kids	NOUN	pobj	O
sentence 243	is	AUX	ROOT	O
sentence 243	the	DET	det	O
sentence 243	main	ADJ	amod	O
sentence 243	attraction	NOUN	attr	location_feature
sentence 243	of	ADP	prep	O
sentence 243	malambuzha	VERB	amod	dam
sentence 243	dam	NOUN	pobj	dam
sentence 245	fantasy	NOUN	compound	feature
sentence 245	park	NOUN	nsubj	feature
sentence 245	is	AUX	ROOT	O
sentence 245	the	DET	det	O
sentence 245	main	ADJ	amod	O
sentence 245	attraction	NOUN	attr	location_feature
sentence 245	of	ADP	prep	O
sentence 245	malambuzha	VERB	amod	dam
sentence 245	dam	NOUN	pobj	dam
sentence 246	spiced	VERB	amod	feature
sentence 246	fruits	NOUN	compound	feature
sentence 246	camp	NOUN	nsubj	feature
sentence 246	is	AUX	ROOT	O
sentence 246	the	DET	det	O
sentence 246	main	ADJ	amod	O
sentence 246	attraction	NOUN	attr	location_feature
sentence 246	of	ADP	prep	O
sentence 246	malambuzha	VERB	amod	dam
sentence 246	dam	NOUN	pobj	dam
sentence 247	trekking	VERB	csubj	feature
sentence 247	tracks	NOUN	dobj	feature
sentence 247	is	AUX	ROOT	O
sentence 247	the	DET	det	O
sentence 247	main	ADJ	amod	O
sentence 247	attraction	NOUN	attr	location_feature
sentence 247	of	ADP	prep	O
sentence 247	malambuzha	VERB	amod	dam
sentence 247	dam	NOUN	pobj	dam
sentence 248	river	NOUN	compound	feature
sentence 248	baths	NOUN	nsubj	feature
sentence 248	is	AUX	ROOT	O
sentence 248	the	DET	det	O
sentence 248	main	ADJ	amod	O
sentence 248	attraction	NOUN	attr	location_feature
sentence 248	of	ADP	prep	O
sentence 248	malambuzha	VERB	amod	dam
sentence 248	dam	NOUN	pobj	dam
sentence 249	malambuzha	PROPN	compound	feature
sentence 249	yakshi	PROPN	nsubjpass	feature
sentence 249	is	AUX	auxpass	O
sentence 249	constructed	VERB	ROOT	location_feature
sentence 249	by	ADP	agent	O
sentence 249	kanayi	NOUN	compound	person
sentence 249	kunhiraman	PROPN	pobj	person
sentence 250	malambuzha	PROPN	compound	feature
sentence 250	yakshi	PROPN	nsubj	feature
sentence 250	is	AUX	ROOT	O
sentence 250	a	DET	det	O
sentence 250	popular	ADJ	amod	feature
sentence 250	sculptor	NOUN	attr	feature
sentence 250	of	ADP	prep	O
sentence 250	Kerala	PROPN	pobj	place
sentence 251	kanjirapuzha	PROPN	compound	dam
sentence 251	dam	NOUN	nsubjpass	dam
sentence 251	is	AUX	auxpass	O
sentence 251	built	VERB	ROOT	location_feature
sentence 251	for	ADP	prep	O
sentence 251	irrigational	ADJ	amod	feature
sentence 251	purposes	NOUN	pobj	feature
sentence 252	kanjirapuzha	PROPN	compound	dam
sentence 252	dam	NOUN	nsubjpass	dam
sentence 252	is	AUX	auxpass	O
sentence 252	situated	VERB	ROOT	loc_area
sentence 252	at	ADP	prep	O
sentence 252	palakkad	ADV	amod	place
sentence 253	the	DET	det	O
sentence 253	kanjirapuzha	PROPN	compound	dam
sentence 253	dam	NOUN	nsubj	dam
sentence 253	is	AUX	ROOT	location_feature
sentence 253	a	DET	det	O
sentence 253	masonry	NOUN	compound	feature
sentence 253	earth	NOUN	compound	feature
sentence 253	dam	NOUN	attr	feature
sentence 254	kanjirapuzha	PROPN	compound	dam
sentence 254	dam	NOUN	nsubj	dam
sentence 254	has	VERB	ROOT	location_feature
sentence 254	three	NUM	nummod	feature
sentence 254	islands	NOUN	dobj	feature
sentence 255	commercial	ADJ	amod	feature
sentence 255	fisheries	NOUN	compound	feature
sentence 255	development	NOUN	compound	feature
sentence 255	programme	NOUN	nsubjpass	feature
sentence 255	is	AUX	auxpass	O
sentence 255	operated	VERB	ROOT	location_feature
sentence 255	at	ADP	prep	O
sentence 255	kanjirapuzha	PROPN	compound	dam
sentence 255	dam	NOUN	pobj	dam
sentence 256	kanjirapuzha	PROPN	compound	dam
sentence 256	dam	NOUN	nsubjpass	dam
sentence 256	is	AUX	auxpass	O
sentence 256	constructed	VERB	ROOT	location_feature
sentence 256	in	ADP	prep	O
sentence 256	1961	NUM	pobj	year
sentence 257	kava	PROPN	compound	place
sentence 257	is	AUX	ROOT	O
sentence 257	the	DET	det	O
sentence 257	gateway	NOUN	attr	location_feature
sentence 257	of	ADP	prep	O
sentence 257	rains	NOUN	pobj	feature
sentence 257	to	ADP	prep	feature
sentence 257	kerala	PROPN	pobj	feature
sentence 258	kava	PROPN	nsubj	place
sentence 258	is	AUX	ROOT	O
sentence 258	a	DET	det	O
sentence 258	finest	ADJ	amod	location_feature
sentence 258	destination	NOUN	attr	location_feature
sentence 258	for	ADP	prep	O
sentence 258	nature	NOUN	compound	person
sentence 258	lovers	NOUN	pobj	person
sentence 259	kava	PROPN	nsubj	place
sentence 259	is	AUX	ROOT	O
sentence 259	a	DET	det	O
sentence 259	finest	ADJ	amod	location_feature
sentence 259	destination	NOUN	attr	location_feature
sentence 259	for	ADP	prep	O
sentence 259	adventures	NOUN	pobj	person
sentence 260	kava	PROPN	nsubj	place
sentence 260	is	AUX	ROOT	O
sentence 260	a	DET	det	O
sentence 260	finest	ADJ	amod	location_feature
sentence 260	destination	NOUN	attr	location_feature
sentence 260	for	ADP	prep	O
sentence 260	photographers	NOUN	pobj	person
sentence 261	evenings	NOUN	nsubj	feature
sentence 261	are	AUX	ROOT	O
sentence 261	the	DET	det	O
sentence 261	best	ADJ	amod	O
sentence 261	time	NOUN	attr	O
sentence 261	to	PART	aux	O
sentence 261	visit	VERB	relcl	location_feature
sentence 261	kava	NOUN	compound	place
sentence 262	ov	INTJ	intj	activity_center
sentence 262	vijayan	ADJ	amod	activity_center
sentence 262	memorial	NOUN	nsubjpass	activity_center
sentence 262	is	AUX	auxpass	O
sentence 262	situated	VERB	ROOT	loc_area
sentence 262	at	ADP	prep	O
sentence 262	palakkad	NOUN	pobj	place
sentence 263	140	NUM	nummod	feature
sentence 263	ov	INTJ	amod	feature
sentence 263	vijayan	ADJ	amod	feature
sentence 263	granite	NOUN	compound	feature
sentence 263	sculptures	NOUN	nsubjpass	feature
sentence 263	can	AUX	aux	O
sentence 263	be	AUX	auxpass	O
sentence 263	seen	VERB	ROOT	location_feature
sentence 263	in	ADP	prep	O
sentence 263	ov	INTJ	intj	activity_center
sentence 263	vijayan	ADJ	amod	activity_center
sentence 263	memorial	NOUN	oprd	activity_center
sentence 264	khasakkinte	PROPN	compound	feature
sentence 264	ithihasam	PROPN	nsubjpass	feature
sentence 264	is	AUX	auxpass	O
sentence 264	written	VERB	ROOT	location_feature
sentence 264	by	ADP	agent	O
sentence 264	ov	INTJ	pobj	person
sentence 264	vijayan	NOUN	pobj	person
sentence 265	dhoni	NOUN	compound	waterfalls
sentence 265	waterfalls	NOUN	nsubjpass	waterfalls
sentence 265	is	AUX	auxpass	O
sentence 265	situated	VERB	ROOT	loc_area
sentence 265	at	ADP	prep	O
sentence 265	palakkad	ADJ	amod	place
sentence 265	district	NOUN	pobj	place
sentence 266	dhoni	NOUN	compound	waterfalls
sentence 266	waterfalls	NOUN	nsubjpass	waterfalls
sentence 266	is	AUX	auxpass	O
sentence 266	bordered	VERB	ROOT	location_feature
sentence 266	by	ADP	agent	O
sentence 266	the	DET	det	O
sentence 266	western	ADJ	amod	ghats
sentence 266	ghats	NOUN	pobj	ghats
sentence 267	dhoni	NOUN	compound	waterfalls
sentence 267	waterfalls	NOUN	nsubj	waterfalls
sentence 267	is	AUX	ROOT	O
sentence 267	an	DET	det	O
sentence 267	ideal	ADJ	amod	O
sentence 267	option	NOUN	attr	location_feature
sentence 267	for	ADP	prep	O
sentence 267	trek	NOUN	compound	person
sentence 267	lovers	NOUN	pobj	person
sentence 268	malampuzha	PROPN	compound	activity_center
sentence 268	rock	NOUN	compound	activity_center
sentence 268	garden	NOUN	nsubjpass	activity_center
sentence 268	is	AUX	auxpass	O
[truncated: 11,279 more rows]
